# Supplementary material for: Spatial and topical imbalances in biodiversity research
Source: PubMed Central journal article supplement (PMC6033392; doi:10.1371/journal.pone.0199327), 2018-07-05
Supplement: pone.0199327.s011.pdf [file pone.0199327.s011.pdf]

**S7 Table:** Gender distribution of core scientists in biodiversity research.

| <b>Decade</b> | <b>Number of female scientists</b> | <b>Number of male scientists</b> |
|---------------|------------------------------------|----------------------------------|
| 1945 - 54     | 0                                  | 1                                |
| 1955 - 64     | 0                                  | 7                                |
| 1965 - 74     | 1                                  | 26                               |
| 1975 - 84     | 4                                  | 26                               |
| 1985 - 94     | 2                                  | 30                               |
| 1995 - 04     | 1                                  | 26                               |
| 2005 - 14     | 2                                  | 28                               |
| <b>Total</b>  | <b>10</b>                          | <b>144</b>                       |
